# Supplementary material for: Quantitative trait locus analysis for spikelet shape-related traits in wild wheat progenitor Aegilops tauschii: Implications for intraspecific diversification and subspecies differentiation
Source: PLoS One. 2017 Mar 6;12(3):e0173210. doi: 10.1371/journal.pone.0173210 (PMC5338802; doi:10.1371/journal.pone.0173210)
Supplement: S1 Table — (XLSX) [file pone.0173210.s001.xlsx]

## Sheet: Sheet1
S1 Table. List of the Ae. tauschii accessions, lineage information and phenotypic data.
Accession	Country	Sublineagea	Subspeciesb	SL (cm)c	NSpc	SpD (cm−1)	SpL (mm)b	EGL (mm)b	EGW (mm)b	GL (mm)	GW (mm)	GH (mm)	LWr
AE933	Georgia	TauL1a	tauschii	10.1917	12.6667	1.24285	8.76667	6.9	3.025	-	-	-	-
CGN10734	Armenia	TauL1a	tauschii	12.7717	15.6667	1.22667	8.93333	6.61667	3.075	-	-	-	-
IG126273	Armenia	TauL1a	tauschii	9.95333	12.6667	1.27261	8.23333	6.23333	2.81667	-	-	-	-
IG126280	Armenia	TauL1a	tauschii	12.2883	15	1.22067	8.91667	6.65833	3.05833	-	-	-	-
IG126293	Armenia	TauL1a	tauschii	12.2633	14.6667	1.19598	8.51667	6.09167	2.75833	-	-	-	-
IG126353	Armenia	TauL1a	tauschii	12.1783	15.6667	1.28644	8.29333	6.64167	2.7	-	-	-	-
IG47196	Azerbaijan	TauL1a	tauschii	10.6583	14	1.31353	8.56667	6.39167	3.18333	-	-	-	-
IG48747	Armenia	TauL1a	tauschii	11.8967	17	1.42897	7.68333	6.18333	2.36667	-	-	-	-
IG48748	Armenia	TauL1a	tauschii	13.995	15.6667	1.11945	9.31667	6.66667	3.15833	-	-	-	-
IG48758	Armenia	TauL1a	tauschii	11.6183	14	1.20499	9	6.33333	3.16667	-	-	-	-
IG49095	Iran	TauL1a	tauschii	12.6633	16.3333	1.28981	9.01667	6.30833	3.34167	-	-	-	-
KU-2113	Iran	TauL1a	tauschii	13.3733	16	1.19641	8.8	6.575	2.99167	-	-	-	-
KU-2115	Iran	TauL1a	tauschii	11.345	14	1.23402	8.43333	6.6	2.95	-	-	-	-
KU-2116	Iran	TauL1a	tauschii	11.9933	15	1.25069	8.75	6.61667	2.71667	-	-	-	-
KU-2120	Iran	TauL1a	tauschii	14.265	16.3333	1.14499	9.13333	6.68333	2.95833	-	-	-	-
KU-2121	Iran	TauL1a	tauschii	9.64167	13.6667	1.41746	8.76667	6.24167	2.89167	-	-	-	-
KU-2131	Turkey	TauL1a	tauschii	10.3617	12.3333	1.19028	9.25	6.74167	3.175	-	-	-	-
KU-2132	Turkey	TauL1a	tauschii	11.9383	13.3333	1.11685	9.38333	6.65833	3.10833	-	-	-	-
KU-2133	Turkey	TauL1a	tauschii	11.3183	13.6667	1.20748	8.3	6.55833	2.91667	-	-	-	-
KU-2136	Turkey	TauL1a	tauschii	11.935	14.6667	1.22888	9.08333	6.425	3.1	-	-	-	-
KU-2137	Turkey	TauL1a	tauschii	10.5927	13.6667	1.2902	9.05	6.325	3.25833	-	-	-	-
KU-2138	Turkey	TauL1a	tauschii	11.8183	15.3333	1.29742	8.8	6.36667	3.36667	-	-	-	-
KU-2140	Turkey	TauL1a	tauschii	11.3933	15	1.31656	8.7	6.11667	3.40833	-	-	-	-
KU-2141	Turkey	TauL1a	tauschii	10.0933	13	1.28798	8.61667	6.2	3.30833	-	-	-	-
KU-2142	Iran	TauL1a	tauschii	9.36667	13	1.3879	7.78333	6.60833	2.6	-	-	-	-
KU-2143	Iran	TauL1a	tauschii	13.4033	15	1.11912	8.86667	6.36667	2.94167	-	-	-	-
KU-2144	Iran	TauL1a	tauschii	11.6983	15	1.28223	8.06667	6.675	2.71667	-	-	-	-
KU-2145	Iran	TauL1a	tauschii	11.7633	15.6667	1.33182	8.7	5.875	3.075	-	-	-	-
KU-2148	Iran	TauL1a	tauschii	10.825	14.3333	1.3241	8.48333	6.08333	3.15	-	-	-	-
KU-2149	Iran	TauL1a	tauschii	11.4967	14	1.21774	8.76667	6.4	3.05	-	-	-	-
KU-2150	Iran	TauL1a	tauschii	11.6567	13.6667	1.17243	8.73333	6.125	3.64167	-	-	-	-
KU-2151	Iran	TauL1a	tauschii	12.3783	14	1.13101	9.01667	6.83333	3.05833	-	-	-	-
KU-2152	Iran	TauL1a	tauschii	11.7983	14.3333	1.21486	8.78333	6.56667	3.56667	4.44333	2.43	1.07	1.82853
KU-2810	Armenia	TauL1a	tauschii	11.28	13.3333	1.18203	8.88333	6.83333	3.075	-	-	-	-
KU-2814	Armenia	TauL1a	tauschii	12.7667	14	1.09661	10.05	6.89167	3.09167	4.65667	2.03	1.06333	2.29392
KU-2816	Armenia	TauL1a	tauschii	11.3417	13.6667	1.205	9.26667	6.86667	3.04167	-	-	-	-
KU-2821	Armenia	TauL1a	tauschii	11.17	13	1.16383	9.01667	6.41667	2.925	-	-	-	-
KU-2822A	Armenia	TauL1a	tauschii	10.6	12.6667	1.19497	8.85	7.15	3.13333	-	-	-	-
KU-2823	Armenia	TauL1a	tauschii	11.445	12.3333	1.07762	9.38333	7.14167	3.11667	-	-	-	-
KU-2824	Armenia	TauL1a	tauschii	13.7767	15	1.0888	9.28333	6.86667	3.2	-	-	-	-
KU-2826	Georgia	TauL1a	tauschii	12.9633	17	1.31139	8.15	7.00833	2.625	-	-	-	-
KU-2828	Georgia	TauL1a	tauschii	9.21167	12	1.3027	7.63333	6.38333	2.70833	-	-	-	-
KU-2834	Georgia	TauL1a	tauschii	11.39	15.6667	1.37548	7.11667	6.30833	2.75	-	-	-	-
KU-2836	Georgia	TauL1a	tauschii	11.7243	14.6667	1.25096	7.93333	6.31667	2.28333	-	-	-	-
PI486270	Turkey	TauL1a	tauschii	12.4417	14.6667	1.17883	9.15	6.83333	2.975	-	-	-	-
PI486274	Turkey	TauL1a	tauschii	11.795	15.3333	1.29999	8.08333	6.68333	2.725	-	-	-	-
PI486277	Turkey	TauL1a	tauschii	10.9583	15	1.36882	7.93333	5.95	2.60833	-	-	-	-
PI554319	Turkey	TauL1a	tauschii	10.2033	13	1.27409	7.65	6.425	2.575	-	-	-	-
AT47	China	TauL1a	tauschii	11.2967	12	1.06226	9.93333	7.25833	3.48333	-	-	-	-
AE1038	Tajikistan	TauL1b	tauschii	11.1933	11.3333	1.01251	10.5333	7.34417	3.61667	-	-	-	-
CGN10767	Pakistan	TauL1b	tauschii	11.6083	15.6667	1.34961	7.65	6.62167	3.13333	-	-	-	-
IG126489	Turkmenistan	TauL1b	tauschii	12.2267	13.6667	1.11778	10.2333	7.86667	3.76667	-	-	-	-
IG127015	Armenia	TauL1b	tauschii	10.4167	12.6667	1.216	10.5333	6.825	2.98333	-	-	-	-
IG48554	Tajikistan	TauL1b	tauschii	10.9667	13	1.18541	9.53333	6.925	3.35833	-	-	-	-
IG48564	Tajikistan	TauL1b	tauschii	10.4967	12.6667	1.20673	8.66667	6.75833	3.40833	-	-	-	-
KU-2010	Afghanistan	TauL1b	tauschii	10.0367	14	1.39489	8.08333	6.31667	3.175	-	-	-	-
KU-2016	Afghanistan	TauL1b	tauschii	12.5817	15.3333	1.2187	9.08333	6.93333	3.3	-	-	-	-
KU-2025	Afghanistan	TauL1b	tauschii	12.225	16	1.30879	8.73333	6.05833	3.01667	-	-	-	-
KU-2027	Afghanistan	TauL1b	tauschii	13.3033	16	1.20271	9.1	6.68333	2.95	-	-	-	-
KU-2028	Afghanistan	TauL1b	tauschii	12.3267	15.3333	1.24392	8.56667	6.56667	2.70833	-	-	-	-
KU-2032	Afghanistan	TauL1b	tauschii	10.1267	14	1.38249	8.7	6.375	3.08333	-	-	-	-
KU-2035	Afghanistan	TauL1b	tauschii	11.3383	15	1.32295	8.43333	6.76333	2.99167	-	-	-	-
KU-2042	Afghanistan	TauL1b	tauschii	11.44	14.6667	1.28205	9.21667	7.03333	3.25833	-	-	-	-
KU-2058	Afghanistan	TauL1b	tauschii	10.645	12.6667	1.18992	9.21667	7.19167	3.11667	-	-	-	-
KU-2617	Afghanistan	TauL1b	tauschii	11.59	14.6667	1.26546	9.5	7.13333	3.325	-	-	-	-
KU-2630	Afghanistan	TauL1b	tauschii	11.6517	13.6667	1.17294	9.68333	6.70833	3.03333	-	-	-	-
KU-2633	Afghanistan	TauL1b	tauschii	12.975	15	1.15607	9.63333	6.70833	3.18333	-	-	-	-
PI499262	China	TauL1b	tauschii	11.1283	15	1.34791	7.83333	5.98333	2.81667	4.813	1.594	1.1	3.01945
PI508262	China	TauL1b	tauschii	12.73	18.3333	1.44017	7.91667	6.33333	2.325	-	-	-	-
AE1090	Kazakhstan	TauL1b	tauschii	12.9767	15.3333	1.18161	9.18333	7.13333	3.10833	5.41333	2.1	1.35333	2.57778
AT55	China	TauL1b	tauschii	11.5417	11.6667	1.01083	10.6667	7.05833	3.73333	-	-	-	-
AT60	China	TauL1b	tauschii	11.115	11.6667	1.04963	9.63333	7.45833	4.425	-	-	-	-
AT76	China	TauL1b	tauschii	11.2867	12	1.0632	10.1833	7.55833	3.48333	-	-	-	-
AT80	China	TauL1b	tauschii	11.7383	12.3333	1.05069	10.1167	8.15	3.96667	-	-	-	-
CGN10768	Pakistan	TauL1b	tauschii	12.0083	15	1.24913	8.85	7.11667	3.36667	4.94667	2.26333	1.38	2.18557
CGN10769	Pakistan	TauL1b	tauschii	13.0317	17.6667	1.35567	8.1	7	3.125	-	-	-	-
CGN10770	Pakistan	TauL1b	tauschii	9.595	12.3333	1.28539	8.65	6.425	3.13333	-	-	-	-
CGN10771	Pakistan	TauL1b	tauschii	11.8767	14.3333	1.20685	8.55	6.79167	3.35	-	-	-	-
IG108561	Pakistan	TauL1b	tauschii	12.9	15.6667	1.21447	8.51667	7.275	3.075	-	-	-	-
IG120735	Turkmenistan	TauL1b	tauschii	10.48	12.6667	1.20865	8.78333	6.825	3.03333	-	-	-	-
IG120736	Uzbekistan	TauL1b	tauschii	13.2783	16.3333	1.23007	8.86667	6.74167	3.01667	-	-	-	-
IG123910	Uzbekistan	TauL1b	tauschii	11.11	14.3333	1.29013	8.96667	6.48333	3.04167	-	-	-	-
IG126387	Turkmenistan	TauL1b	tauschii	10.0133	11.6667	1.16511	9.91667	7.23333	3.41667	5.04	2.27667	1.51333	2.21376
IG131606	Kyrgyzstan	TauL1b	tauschii	12.015	15.6667	1.30393	8.1	6.28333	2.83333	5.25333	2.16333	1.22	2.42835
IG46663	Pakistan	TauL1b	tauschii	11.4417	13.6667	1.19446	9.18333	6.425	3.425	5.48667	2.30333	1.32667	2.38205
IG46666	Pakistan	TauL1b	tauschii	12.0183	13.6667	1.13715	10.5667	7.38333	3.55	-	-	-	-
IG46682	Pakistan	TauL1b	tauschii	12.5517	15	1.19506	9.01667	6.525	3.25	-	-	-	-
IG48518	Turkmenistan	TauL1b	tauschii	12.6983	15.3333	1.20751	8.56667	6.65	3.44167	-	-	-	-
IG48539	Uzbekistan	TauL1b	tauschii	11.8783	15	1.2628	9.15	6.79167	3.40667	-	-	-	-
IG48559	Tajikistan	TauL1b	tauschii	13.295	15.3333	1.15332	9.11667	6.94167	2.78333	-	-	-	-
IG48565	Uzbekistan	TauL1b	tauschii	11.4133	13.6667	1.19743	8.81667	6.00833	3.325	-	-	-	-
IG48567	Uzbekistan	TauL1b	tauschii	10.3567	11.6667	1.12649	8.9	6.84167	3.225	-	-	-	-
KU-20-6	Pakistan	TauL1b	tauschii	11.76	15	1.27551	8.43333	6.68333	3.34167	-	-	-	-
KU-2001	Pakistan	TauL1b	tauschii	13.0377	15.6667	1.20165	9.38333	7.45	3.74167	-	-	-	-
KU-2003	Pakistan	TauL1b	tauschii	12.3383	14.6667	1.18871	8.75	7.28333	3.16667	6.266	2.533	1.854	2.47375
KU-2006	Pakistan	TauL1b	tauschii	11.6967	14.3333	1.22542	9.23333	6.59	3.23333	-	-	-	-
KU-2008	Pakistan	TauL1b	tauschii	11.835	13.6667	1.15477	9.28333	7.20833	3.25833	-	-	-	-
KU-2018	Afghanistan	TauL1b	tauschii	10.8783	12.3333	1.13375	9.91667	7.24167	3.55833	-	-	-	-
KU-2022	Afghanistan	TauL1b	tauschii	10.5117	12	1.14159	9.76667	7.19167	3.23333	-	-	-	-
KU-2039	Afghanistan	TauL1b	tauschii	12.535	16	1.27643	8.3	6.41667	3.55	-	-	-	-
KU-2044	Afghanistan	TauL1b	tauschii	11.915	14.3333	1.20297	9.21667	6.825	3.84167	-	-	-	-
KU-2050	Afghanistan	TauL1b	tauschii	10.2167	12.3333	1.20718	9.11667	6.93333	3.425	-	-	-	-
KU-2051	Afghanistan	TauL1b	tauschii	10.6817	13.6667	1.27945	8.4	6.14167	3.275	-	-	-	-
KU-2056	Afghanistan	TauL1b	tauschii	12.78	15.6667	1.22587	8.83333	6.79167	3.24167	-	-	-	-
KU-2059	Afghanistan	TauL1b	tauschii	12.2467	16	1.30648	8.13333	6.88333	2.99167	-	-	-	-
KU-2063	Afghanistan	TauL1b	tauschii	13.4167	15.6667	1.1677	9.31667	6.875	3.60833	-	-	-	-
KU-2066	Afghanistan	TauL1b	tauschii	10.4883	14	1.33482	8.3	6.675	3.16667	-	-	-	-
KU-2082	Iran	TauL1b	tauschii	10.4517	13.3333	1.27571	8.76667	6.00833	3.22	-	-	-	-
KU-2087	Iran	TauL1b	tauschii	12.26	15	1.22349	9.3	6.38333	3.45	4.265	2.055	1.285	2.07543
KU-2612	Afghanistan	TauL1b	tauschii	11.7417	13.6667	1.16395	9.06667	6.83333	3.38333	-	-	-	-
KU-2621	Afghanistan	TauL1b	tauschii	10.5217	14	1.33059	8.51667	6.43333	3.01667	-	-	-	-
KU-2624	Afghanistan	TauL1b	tauschii	11.7367	14	1.19284	9.2	7.28333	3.15	-	-	-	-
KU-2627	Afghanistan	TauL1b	tauschii	11.1883	14	1.2513	9.2	6.28333	3.14167	-	-	-	-
KU-2632	Afghanistan	TauL1b	tauschii	13.26	15	1.13122	10.0333	7.29167	3.175	-	-	-	-
KU-2635	Afghanistan	TauL1b	tauschii	13.0667	16.6667	1.27551	8.85	6.975	3.03333	-	-	-	-
KU-2636	Afghanistan	TauL1b	tauschii	11.925	15	1.25786	8.13333	6.275	2.61667	-	-	-	-
KU-2638	Afghanistan	TauL1b	tauschii	12.4517	16	1.28497	9.21667	6.49167	2.94167	-	-	-	-
KU-2639	Afghanistan	TauL1b	tauschii	11.2167	12.6667	1.12927	9.73333	7.45833	3.2	-	-	-	-
PI476874	Afghanistan	TauL1b	tauschii	12.6183	15.3333	1.21516	9.08333	6.66667	3.68333	5.17667	2.30667	1.49667	2.24422
PI508264	China	TauL1b	tauschii	10.115	10.3333	1.02159	9.76667	6.15	5.13333	-	-	-	-
IG47259	Syria	TauL1x	tauschii	9.41	12.6667	1.34609	7.81667	6.30833	2.93333	4.68667	2.02667	1.21667	2.3125
IG48042	India	TauL1x	tauschii	10.2533	14.3333	1.39792	8.38333	6.23333	2.80833	4.74333	2.21	1.28	2.1463
IG48508	Turkmenistan	TauL1x	tauschii	12.8617	16	1.24401	8.43333	6.175	2.775	-	-	-	-
KU-2122	Iran	TauL1x	tauschii	11.1067	14.3333	1.29052	8.1	5.88333	3.53333	-	-	-	-
KU-2153	Iran	TauL1x	tauschii	12.9833	16	1.23235	8.98333	7.21667	3	-	-	-	-
KU-2157	Iran	TauL1x	tauschii	11.95	14.6667	1.22734	8.48333	6.5	2.91667	-	-	-	-
KU-2068	Iran	TauL1x	tauschii	12.41	12.6667	1.02068	10.5333	7.625	3.64167	-	-	-	-
KU-2154	Iran	TauL1x	tauschii	13.2217	15	1.1345	9.76667	7.29167	3.75833	-	-	-	-
KU-2619	Afghanistan	TauL1x	tauschii	10.815	14.6667	1.35614	8.25	6.48333	2.93333	-	-	-	-
AE1037	Georgia	TauL2a	tauschii	8.475	11	1.29794	9.73333	6.55833	3.175	-	-	-	-
IG120863	Dagestan	TauL2a	tauschii	11.2417	11.6667	1.03781	11.1167	6.5	3.84167	-	-	-	-
IG47173	Armenia	TauL2a	tauschii	8.265	11.3333	1.37124	9.45	6.43167	3.20833	-	-	-	-
IG47199	Azerbaijan	TauL2a	tauschii	10.3483	10.6667	1.03076	10.6333	6.75	3.38333	-	-	-	-
IG47204	Azerbaijan	TauL2a	tauschii	9.4	11.3333	1.20567	11.4833	7.14167	3.66	-	-	-	-
IG48274	Dagestan	TauL2a	tauschii	9.00167	10	1.11091	10.4	6.10833	3.45833	-	-	-	-
KU-20-1	Dagestan	TauL2a	tauschii	7.64333	9	1.1775	10.6333	6.54167	3.19167	-	-	-	-
KU-20-7	Iran	TauL2a	tauschii	10.215	11.6667	1.14211	11.2	7.55833	4.30833	-	-	-	-
KU-20-8	Iran	TauL2a	tauschii	10.5483	11.6667	1.10602	11.45	7.66667	4.175	5.82	2.91333	1.85667	1.99771
KU-2083	Iran	TauL2a	tauschii	10.0367	11.3333	1.12919	11.6167	7.6	4.525	-	-	-	-
KU-2086	Iran	TauL2a	tauschii	14.3333	15.3333	1.06977	11.95	8.15	4.01667	-	-	-	-
KU-2111	Iran	TauL2a	tauschii	11.37	13.3333	1.17268	10.7667	6.83333	3.15833	-	-	-	-
KU-2112	Iran	TauL2a	tauschii	11.045	13.3333	1.20718	10.5833	7	3.28333	-	-	-	-
KU-2118	Iran	TauL2a	tauschii	9.81333	11.3333	1.15489	10.65	7.14167	4.05	-	-	-	-
KU-2124	Iran	TauL2a	tauschii	11.9233	14.6667	1.23008	8.31667	5.94167	3.61667	5.76667	3.12667	1.88333	1.84435
KU-2126	Iran	TauL2a	tauschii	11.1417	12	1.07704	11.7	6.93333	4.48333	5.97667	3.13	1.93333	1.90948
KU-2155	Iran	TauL2a	tauschii	11.2067	13	1.16002	11.05	6.81667	3.85833	-	-	-	-
KU-2156	Iran	TauL2a	tauschii	10.9267	12.6667	1.15924	10.4833	6.675	3.61667	-	-	-	-
KU-2804	Azerbaijan	TauL2a	tauschii	9.91167	10.6667	1.07617	10.5167	6.825	3.46667	-	-	-	-
KU-2811	Armenia	TauL2a	tauschii	12.5667	13.3333	1.06101	11.9333	7.35833	3.98333	5.74667	2.36933	1.51667	2.42544
PI486267	Turkey	TauL2a	tauschii	11.3	13	1.15044	11.5333	7.39167	3.71667	-	-	-	-
IG126991	Armenia	TauL2a	tauschii	13.905	14	1.00683	12.2333	7.35	3	-	-	-	-
IG47193	Azerbaijan	TauL2a	tauschii	13.5817	12.3333	0.908087	10.3	6.7	3.65	-	-	-	-
KU-2806	Azerbaijan	TauL2a	tauschii	9.60667	11.6667	1.21443	10.15	6.36667	3.38333	-	-	-	-
KU-2827	Georgia	TauL2a	tauschii	11.2633	11.6667	1.03581	10.6167	6.64167	3.03333	-	-	-	-
KU-2835B	Georgia	TauL2a	tauschii	10.4217	11.3333	1.08748	10.0167	6.56667	2.975	-	-	-	-
IG47202	Azerbaijan	TauL2b	tauschii	10.385	13.3333	1.2839	10.1333	6.09167	3.14167	-	-	-	-
KU-2069	Iran	TauL2b	tauschii	10.995	11.6667	1.06109	12.1167	8.1	4.5	6.01	2.95	1.85667	2.03729
KU-2093	Iran	TauL2b	strangulata	9.385	11.6667	1.24312	10.2	6.14	4.94167	5.18	2.47	1.65333	2.09717
KU-2097	Iran	TauL2b	tauschii	9.74667	10.3333	1.06019	10.8833	7.575	3.93333	6.34667	2.54333	1.71	2.49541
KU-2104	Iran	TauL2b	tauschii	10.745	10.3333	0.961688	11.0167	7.01667	3.38333	-	-	-	-
KU-2109	Iran	TauL2b	tauschii	13.065	14.6667	1.12259	8.65	6.43333	3.11667	-	-	-	-
KU-2158	Iran	TauL2b	tauschii	8.09	8.66667	1.07128	9.71667	6.21667	3.08333	6.11667	2.29667	1.73	2.66328
KU-2159	Iran	TauL2b	tauschii	9.46333	9.66667	1.02149	10.2667	6.725	3.49167	5.11667	2.36667	1.57333	2.16197
KU-20-10	Iran	TauL2b	tauschii	7.635	8.66667	1.13512	9.06667	6.11667	2.875	-	-	-	-
KU-2088	Iran	TauL2b	strangulata	8.945	11.3333	1.267	9.36667	6.16667	4.68333	4.65	2.895	1.615	1.60622
KU-2090	Iran	TauL2b	strangulata	8.03667	10	1.2443	9.36667	6.075	4.83333	4.72333	2.82333	1.51667	1.67296
KU-2091	Iran	TauL2b	strangulata	8.53167	9.66667	1.13303	9.93333	6.75	5.325	5.22333	2.92333	1.88333	1.78677
KU-2092	Iran	TauL2b	strangulata	9.29333	11.3333	1.21951	10.1667	6.79167	4.51667	5.11667	2.75333	1.49667	1.85835
KU-2096	Iran	TauL2b	tauschii	10.0333	11.3333	1.12957	10.75	6.39167	4.19167	5.3	2.805	1.715	1.88948
KU-2098	Iran	TauL2b	tauschii	10.5617	12	1.13618	10.5667	6.73333	4.375	-	-	-	-
KU-2100	Iran	TauL2b	tauschii	7.845	10	1.2747	9.88333	6.61667	3.28333	-	-	-	-
KU-2101	Iran	TauL2b	tauschii	8.92833	10.6667	1.1947	10.25	5.95833	3.43167	-	-	-	-
KU-2103	Iran	TauL2b	tauschii	8.62167	10	1.15987	10.05	6.75	3.775	5.59333	2.53333	1.68667	2.20789
KU-2105	Iran	TauL2b	tauschii	9.53	9.33333	0.979363	10	6.76667	3.50833	6.17667	2.44333	1.81333	2.52797
KU-2106	Iran	TauL2b	tauschii	9.23167	8.33333	0.90269	11.3167	7.70833	3.7	-	-	-	-
KU-2107	Iran	TauL2b	tauschii	8.46	9	1.06383	9.48333	5.975	2.35833	-	-	-	-
KU-2108	Iran	TauL2b	tauschii	11.1217	11.3333	1.01903	10.7	6.775	3.55833	-	-	-	-
KU-2160	Iran	TauL2b	tauschii	6.86667	8.33333	1.21359	8.48333	5.49167	3.41667	-	-	-	-
IG47182	Azerbaijan	TauL2x	tauschii	11.3117	11.3333	1.00192	10.95	6.525	3.71667	5.808	2.442	1.906	2.37838
IG47186	Azerbaijan	TauL2x	tauschii	9.19167	10	1.08794	11	6.58333	3.725	-	-	-	-
IG47188	Azerbaijan	TauL2x	tauschii	10.4383	11	1.05381	10.25	6.99167	3.375	-	-	-	-
IG47192	Azerbaijan	TauL2x	tauschii	11.605	12	1.03404	11.1667	7.31667	3.55833	-	-	-	-
IG47194	Azerbaijan	TauL2x	tauschii	9.01333	12	1.33136	8.81667	5.85	3.39167	-	-	-	-
IG47203	Azerbaijan	TauL2x	tauschii	8.59	9.66667	1.12534	10.3833	6.90833	3.50833	-	-	-	-
KU-2074	Iran	TauL2x	strangulata	8.47167	12.3333	1.45583	8.83333	5.60833	5.16667	4.565	2.705	1.49	1.68762
KU-2075	Iran	TauL2x	strangulata	9.69167	12	1.23818	8.83333	5.725	4.85	4.435	2.875	1.82	1.54261
KU-2077	Iran	TauL2x	strangulata	9.095	11.6667	1.28276	9.16667	6.325	4.75833	4.6	2.51	1.54	1.83267
KU-2110	Iran	TauL2x	tauschii	9.19	9.66667	1.05187	10.7667	6.625	3.09167	-	-	-	-
KU-2801	Azerbaijan	TauL2x	tauschii	10.23	11.3333	1.10785	10.6667	7.175	3.75	-	-	-	-
IG120866	Dagestan	TauL2x	tauschii	11.0233	11.6667	1.05836	11.3333	6.90833	3.9	-	-	-	-
KU-20-9	Iran	TauL2x	strangulata	10.055	13	1.29289	8.68333	5.78333	4.975	4.85	3	1.805	1.61667
KU-2076	Iran	TauL2x	strangulata	9.53667	12	1.2583	9.5	6	4.85	4.66	2.83	1.8	1.64664
KU-2079	Iran	TauL2x	strangulata	8.56833	11.6667	1.3616	9.55	5.99167	4.41667	4.515	2.52	1.39	1.79167
KU-2080	Iran	TauL2x	strangulata	8.27	12	1.45103	8.71667	5.13333	4.575	4.755	2.63	1.7	1.80798
AE454	Georgia	TauL3	tauschii	14.9233	15.3333	1.02747	10.8833	6.26667	3.55	-	-	-	-
AE457	Georgia	TauL3	tauschii	10.5567	13	1.23145	9.18333	6.28333	3.13333	-	-	-	-
AE929	Georgia	TauL3	tauschii	12.0783	13	1.07631	11.1	6.26667	3.13333	5.72667	2.11	1.08	2.71406
KU-2829A	Georgia	TauL3	tauschii	11.755	13	1.10591	10.6	6.41667	3.39167	4.89667	2.12333	1.34	2.30612
KU-2832	Georgia	TauL3	tauschii	9.305	11.6667	1.25381	9.86667	5.83333	3.33333	-	-	-	-
aMatsuoka et al. (2015); TauL1x and TauL2x indicate admixture.
bMatsuoka et al. (2009)
cTakumi et al. (2009)
